# Supplementary material
Source: PubMed Central journal article supplement (PMC8963132)
Supplement: NIHMS1748878-supplement-3.pdf [file NIHMS1748878-supplement-3.pdf]

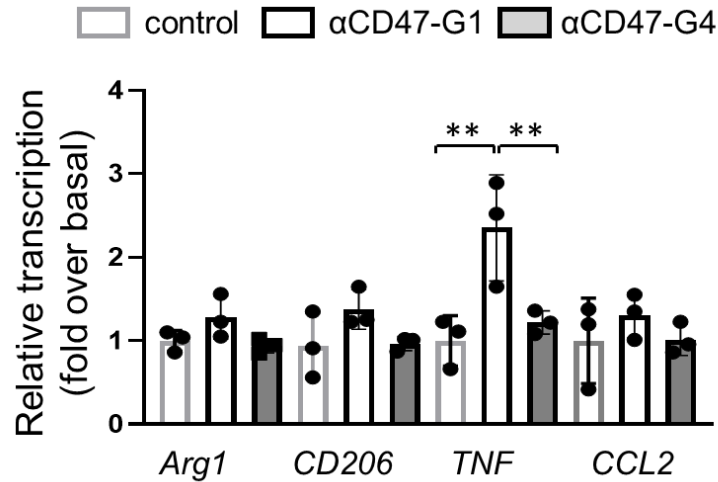

**Supplementary Figure 2. The effect of  $\alpha$ CD47-G1 on the expression of the genes marking macrophage polarization *in vitro*.** Primary human macrophages were cocultured with A2780 cells at a ratio of 1:1 with or without  $\alpha$ CD47-G1 or  $\alpha$ CD47-G4 for 6 hours, followed by gene transcript quantification by RT-qPCR. Statistical analyses were performed by one-way ANOVA with P values corrected for multiple comparisons by Bonferroni method (n = 3 donors). \*\*P  $\leq$  0.01. Data were presented as mean values  $\pm$  SD.
