# Supplementary material
Source: PubMed Central journal article supplement (PMC8963132)
Supplement: NIHMS1748878-supplement-4.pdf [file NIHMS1748878-supplement-4.pdf]

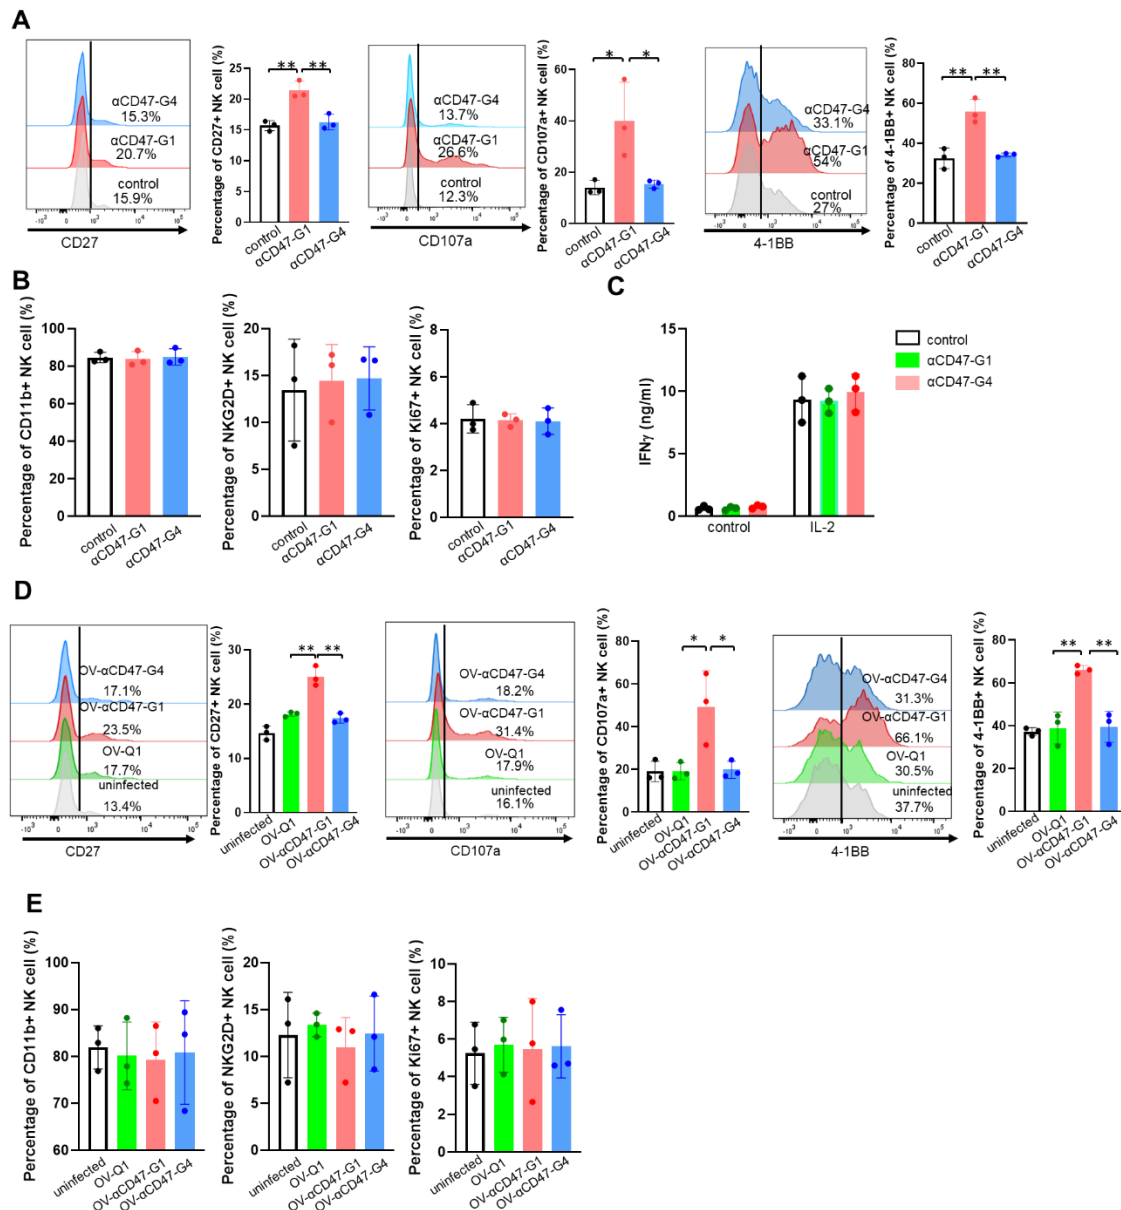

**Supplementary Figure 3. The effect of  $\alpha$ CD47-G1 or  $\alpha$ CD47-G4 on the expression of NK cell markers.** (A-C) The effect of  $\alpha$ CD47-G1 or  $\alpha$ CD47-G4 on the expressions of CD27, CD107a, 4-1BB (A), CD11b, NKG2D, Ki67 (B) and IFN $\gamma$  (C) of NK cells when cocultured with A2780 cells at an effector:target ratio of 1:1. (D and E) The effect of OV- $\alpha$ CD47-G1 and OV- $\alpha$ CD47-G4 on the expression of CD27, CD107a, 4-1BB (D), CD11b, NKG2D, and Ki67 (E) of NK cells when cocultured with A2780 cells in the presence of supernatants from OV-Q1-, OV- $\alpha$ CD47-G1- and OV- $\alpha$ CD47-G4-infected A2780 ovarian cancer cells. All experiments were performed with three donors. Error bars represent standard deviations of the means of three donors. Statistical analyses were performed by one-way ANOVA with P values corrected for multiple comparisons by Bonferroni method (n = 3 donors). \*P  $\leq$  0.05; \*\*P  $\leq$  0.01. Data were presented as mean values  $\pm$  SD.
