# Supplementary material
Source: PubMed Central journal article supplement (PMC8963132)
Supplement: NIHMS1748878-supplement-5.pdf [file NIHMS1748878-supplement-5.pdf]

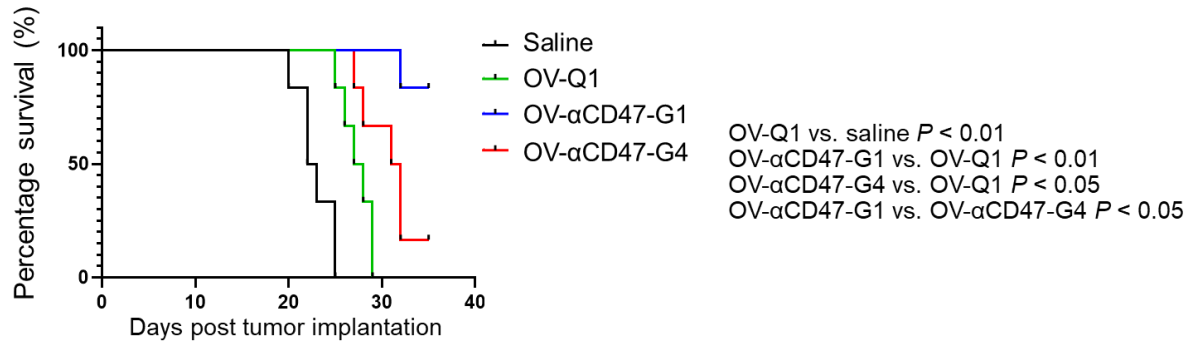

**Supplementary Figure 4. OV-αCD47-G1 improves the therapeutic efficacy against ovarian cancer in a xenograft model.** The survival curve of a xenografted ovarian cancer mouse model with indicated treatments. Survival was estimated by the Kaplan–Meier method and compared by log-rank test (n = 6 animals).
