# Supplementary material
Source: PubMed Central journal article supplement (PMC8963132)
Supplement: NIHMS1748878-supplement-6.pdf [file NIHMS1748878-supplement-6.pdf]

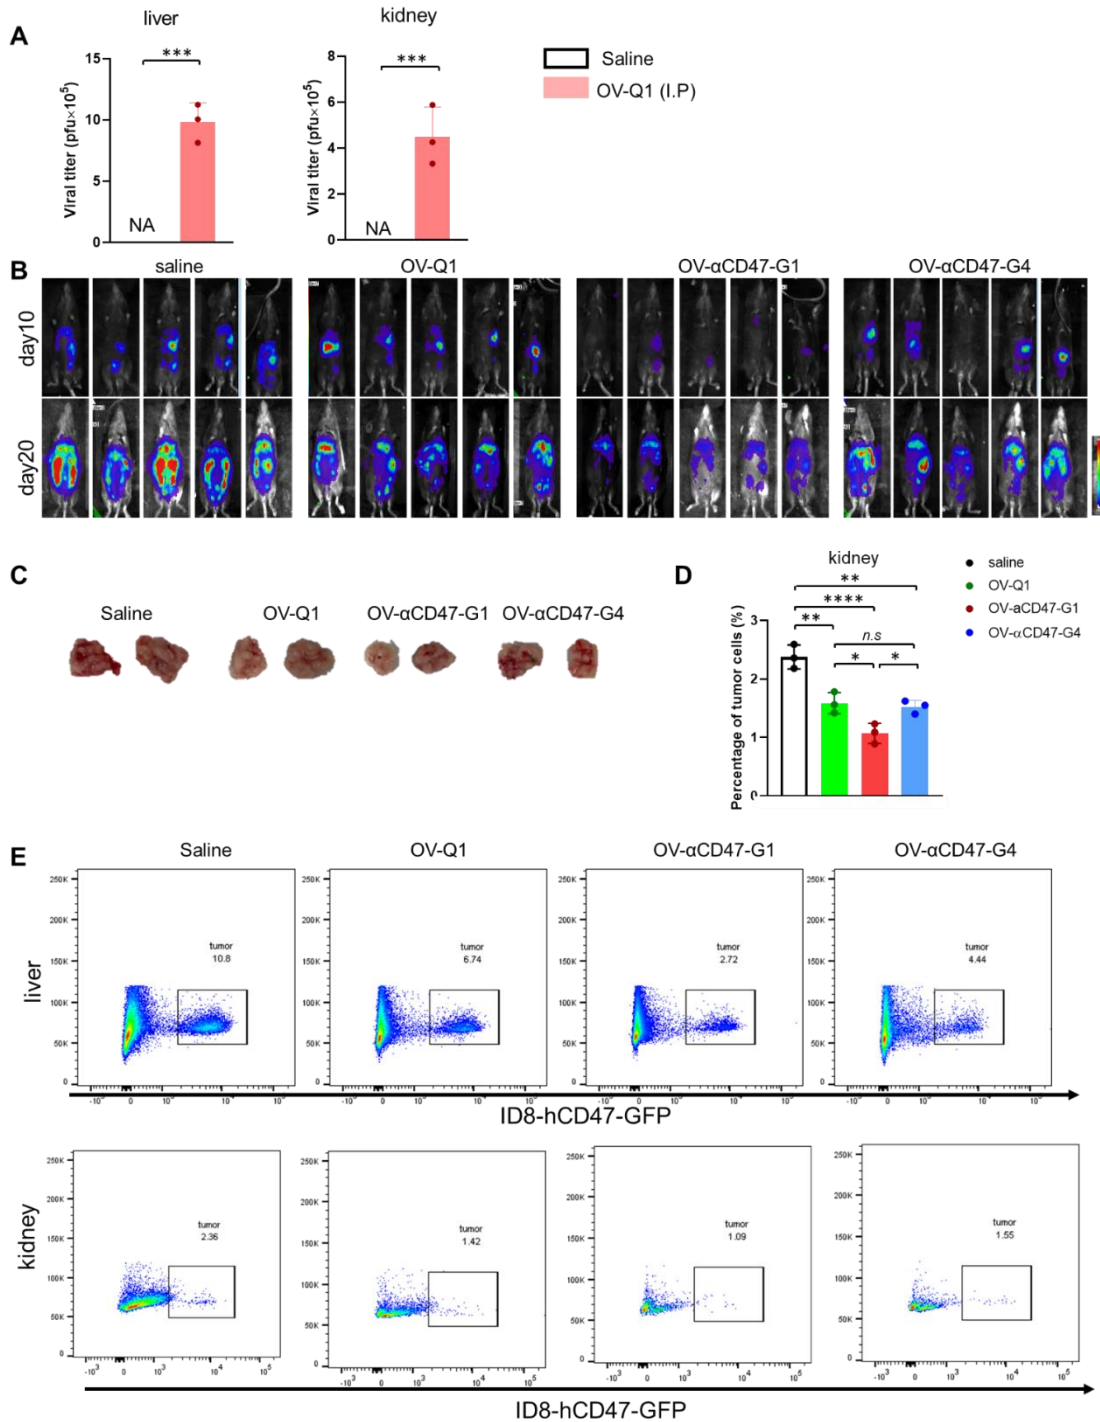

**Supplementary Figure 5. OV- $\alpha$ CD47-G1 enhances the therapeutic efficacy in an immunocompetent ovarian cancer metastasis mouse model.** (A) Virus titers in the liver and kidney three days after OV-Q1 i.p injection. (B) Time-lapse luciferase imaging of immunocompetent ovarian cancer mouse model with indicated treatments. (C) Representative images of tumors in the ID8-hCD47 immunocompetent ovarian cancer metastasis mouse model with indicated treatments. (D) Percentages of tumor cells among total live cells in the kidney. (E) Percentages of tumor cells among total live cells in the liver and kidney in the ID8-hCD47

immunocompetent ovarian cancer metastasis mouse model treated with vehicle control or different viruses. For D, statistical analyses were performed by one-way ANOVA with P values corrected for multiple comparisons by Bonferroni method (n = 3 mice). \*\*P ≤ 0.01; \*\*\*P ≤ 0.001. Data were presented as mean values +/- SD.
