# Supplementary material
Source: PubMed Central journal article supplement (PMC8963132)
Supplement: NIHMS1748878-supplement-7.pdf [file NIHMS1748878-supplement-7.pdf]

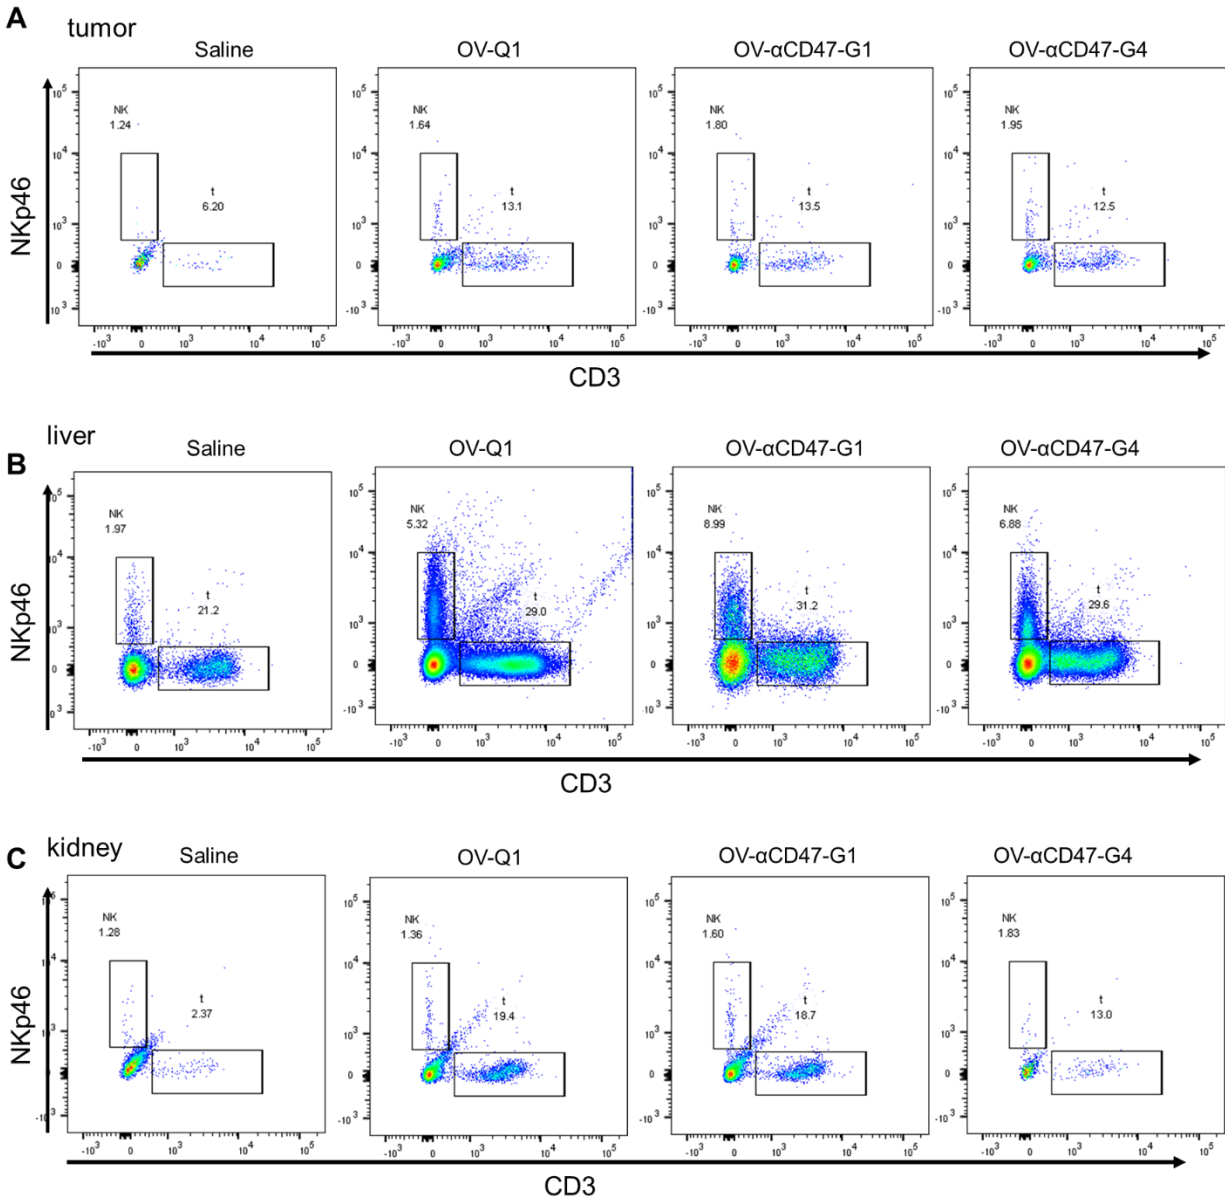

**Supplementary Figure 6. OV treatments increase NK cell and T cell infiltration in the ID8-hCD47 immunocompetent ovarian cancer metastasis mouse model. (A-C) NK cells and T cells in the tumor (A), liver (B), and kidney (C) were measured by flow cytometry after mice being treated with saline, OV-Q1, OV- $\alpha$ CD47-G1, or OV- $\alpha$ CD47-G4.**
