# Supplementary material
Source: PubMed Central journal article supplement (PMC8963132)
Supplement: NIHMS1748878-supplement-8.pdf [file NIHMS1748878-supplement-8.pdf]

### A tumor

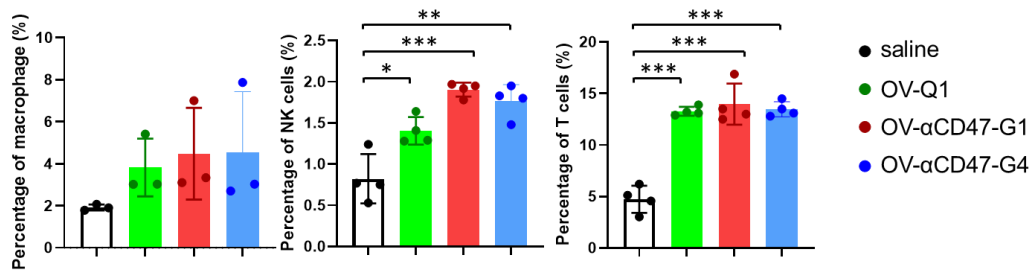

### B liver

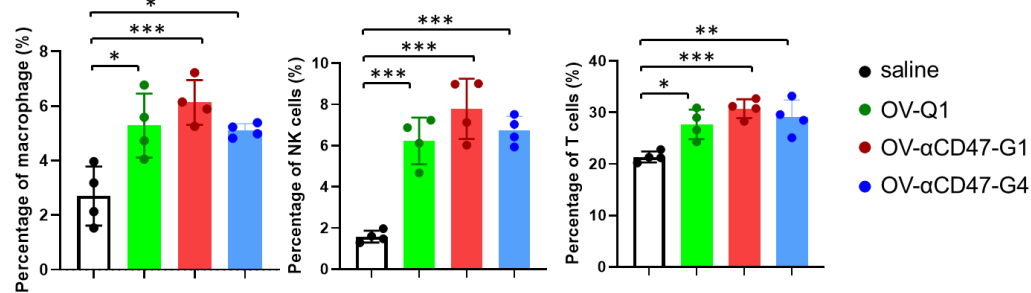

### C kidney

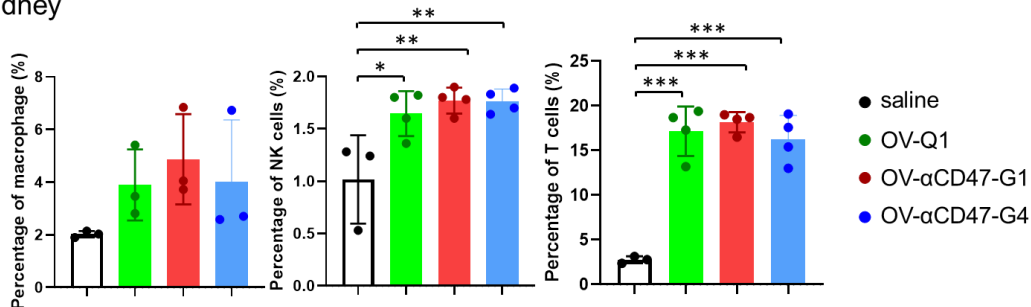

### D kidney

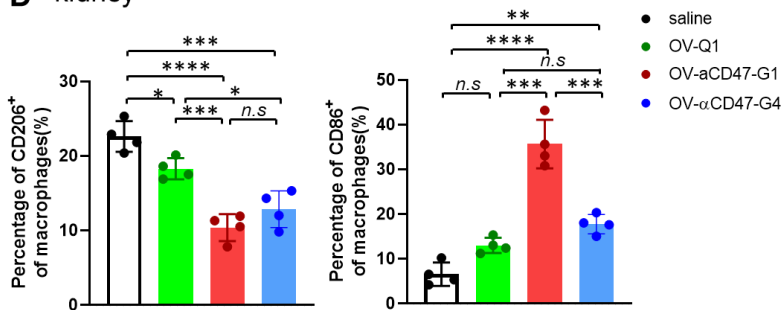

### E kidney

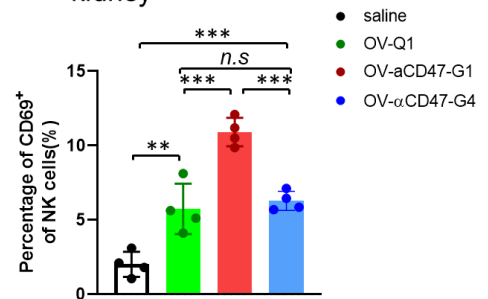

**Supplementary Figure 7. OV-Q1, OV-αCD47-G1 and OV-αCD47-G4 treatments increase immune cell infiltration in the ID8-hCD47 immunocompetent ovarian cancer metastasis mouse model. (A-C)** Percentages of macrophages, NK cells, and T cells in the tumor (A), liver (B), and kidney among lymphocyte cells (C) were measured by flow cytometry after mice being treated with saline, OV-Q1, OV-αCD47-G1, or OV-αCD47-G4. **(D and E)** M1 and M2 types macrophages (D), and the percentage of CD69<sup>+</sup> NK cells among lymphocyte cells (E) in the kidney

were measured by flow cytometry. Statistical analyses were performed by one-way ANOVA with P values corrected for multiple comparisons by Bonferroni method (n = 3 or 4 mice per group). \*P ≤ 0.05; \*\*P ≤ 0.01; \*\*\*P ≤ 0.001; \*\*\*\*P ≤ 0.0001. Data were presented as mean values +/- SD.
