# Supplementary material
Source: PubMed Central journal article supplement (PMC8963132)
Supplement: NIHMS1748878-supplement-10.pdf [file NIHMS1748878-supplement-10.pdf]

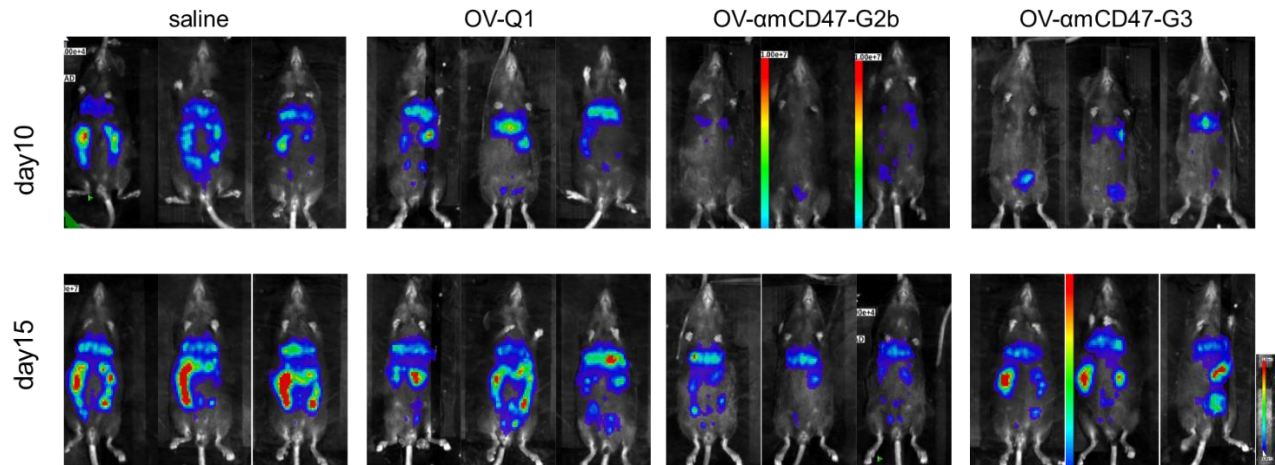

**Supplementary Figure 9. OV- $\alpha$ mCD47-G2b is efficacious to treat ovarian cancer in an ID8 immunocompetent metastasis mouse model.** The representative luciferase imaging of immunocompetent ovarian cancer mouse model with indicated treatments.
