# Supplementary material
Source: PubMed Central journal article supplement (PMC8963132)
Supplement: NIHMS1748878-supplement-11.pdf [file NIHMS1748878-supplement-11.pdf]

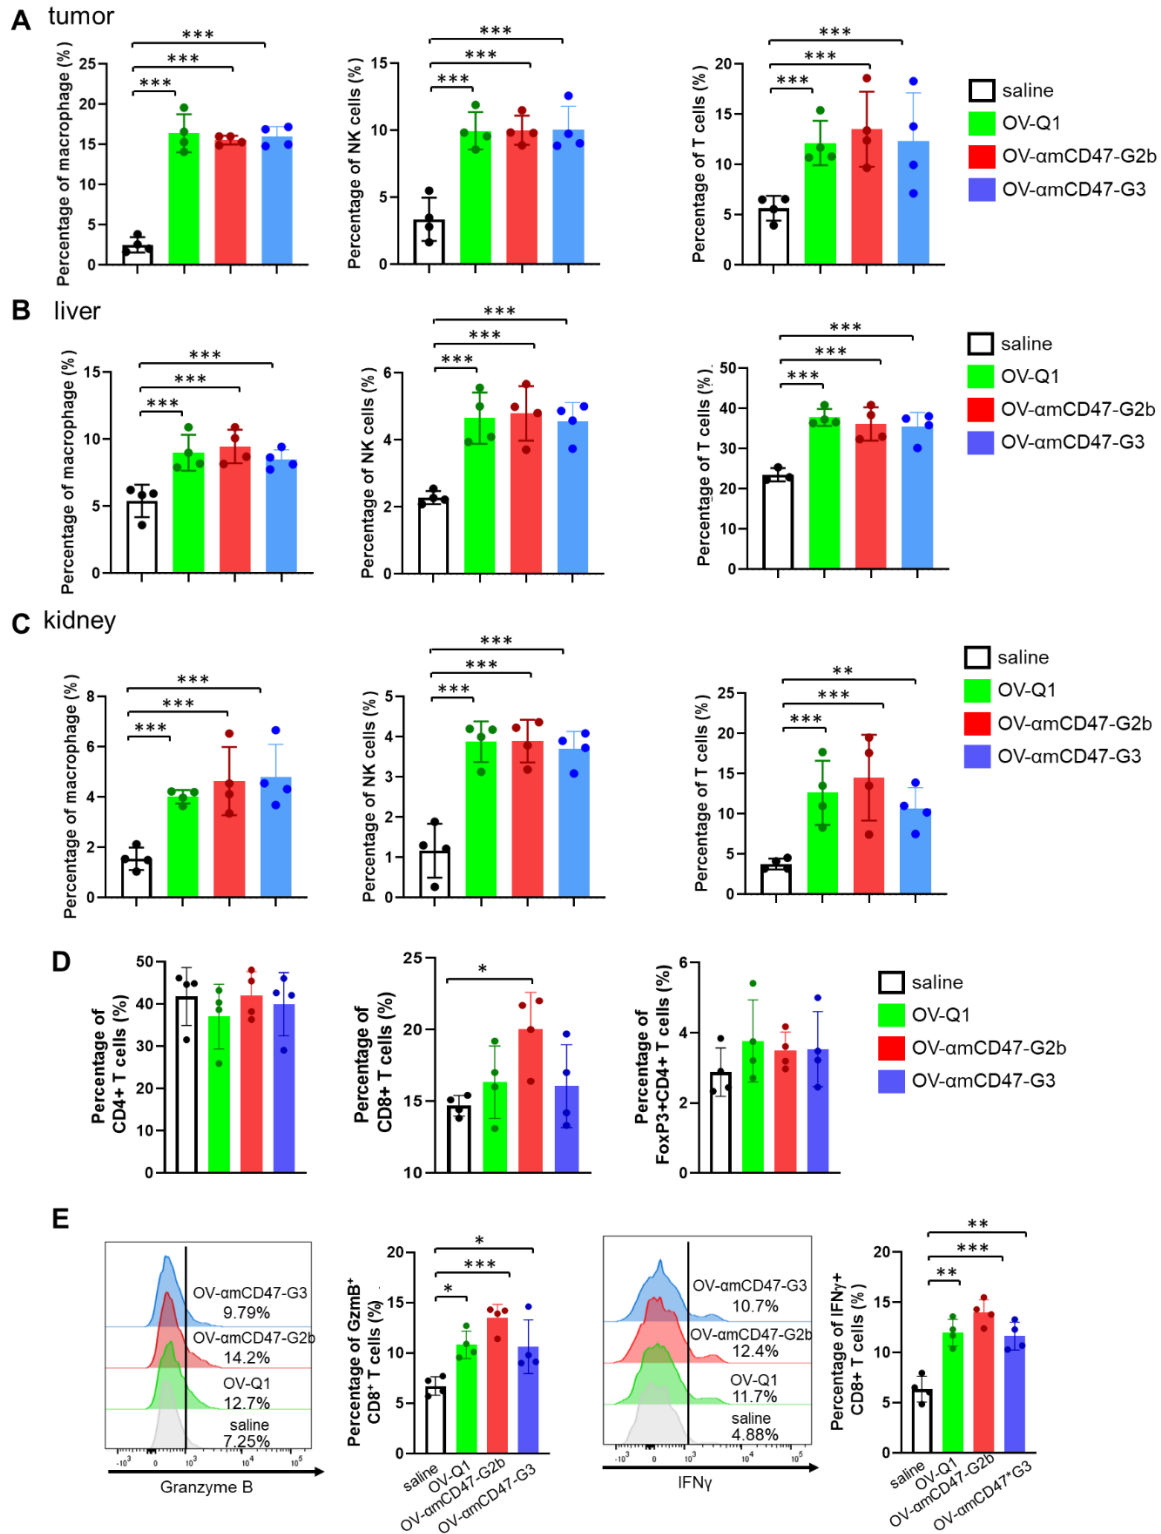

**Supplementary Figure 10. OV-Q1, OV-amCD47-G2b and OV-amCD47-G3 treatments increase immune cell infiltration in the ID8 immunocompetent ovarian cancer metastasis mouse model. (A-C) Percentages of macrophages, NK cells, and T cells among lymphocyte cells**

in the tumor (A), liver (B), and kidney (C) were measured by flow cytometry after mice being treated with saline, OV-Q1, OV- $\alpha$ mCD47-G2b, or OV- $\alpha$ mCD47-G3. **(D)** Percentages of CD4<sup>+</sup> T cells, CD8<sup>+</sup> T cells, and Treg T cells among T cells were analyzed by flow cytometry. **(E)** The percentages of granzyme B<sup>+</sup> CD8<sup>+</sup> T cells and IFN $\gamma$ <sup>+</sup> CD8<sup>+</sup> T cells were analyzed by flow cytometry. Statistical analyses were performed by one-way ANOVA with P values corrected for multiple comparisons by Bonferroni method (n = 4 mice per group). \*P  $\leq$  0.05; \*\*P  $\leq$  0.01; \*\*\*P  $\leq$  0.001; \*\*\*\*P  $\leq$  0.0001. Data were presented as mean values  $\pm$  SD.
