# Supplementary material
Source: PubMed Central journal article supplement (PMC8963132)
Supplement: NIHMS1748878-supplement-12.pdf [file NIHMS1748878-supplement-12.pdf]

**A** tumor

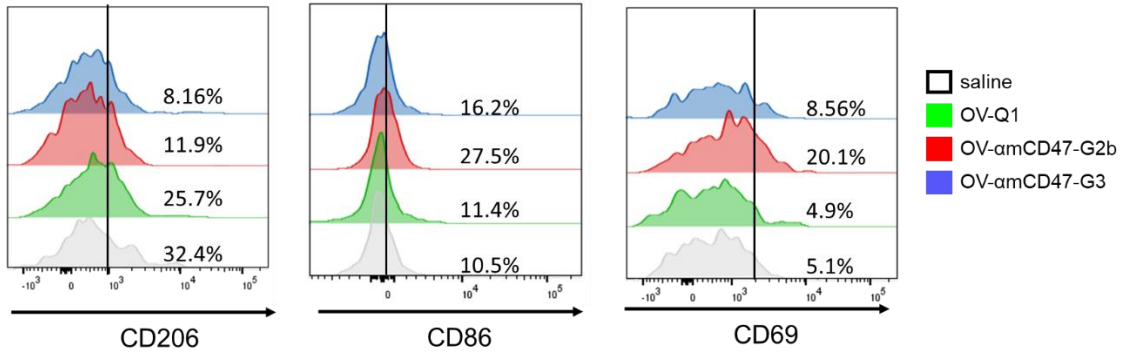

**B** liver

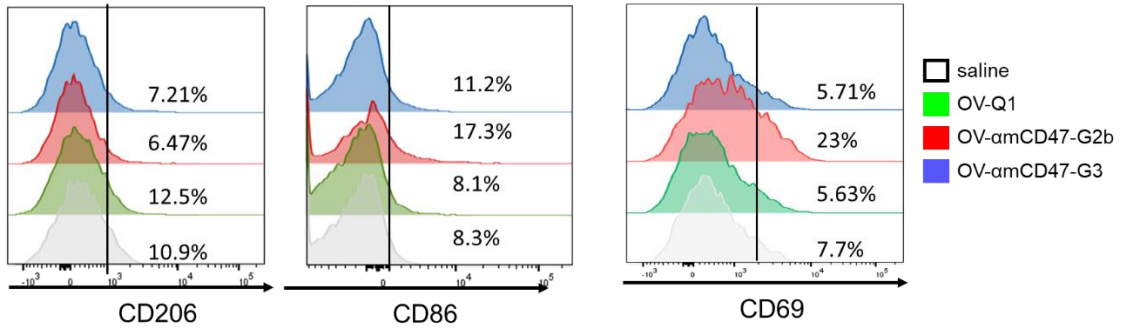

**C** kidney

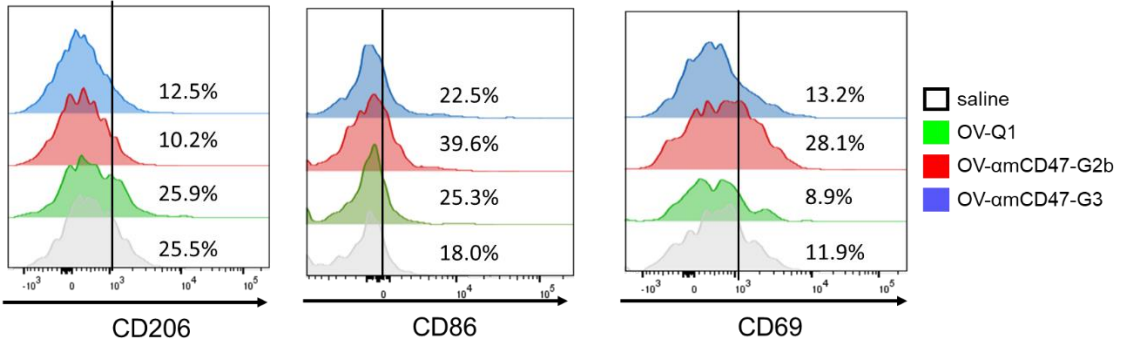

**Supplementary Figure 11. OV- $\alpha$ mCD47-G2b treatments promote macrophage M1 polarization and NK cell activation in ID8 immunocompetent ovarian cancer metastasis mouse model. (A-C) M1 and M2 macrophages, CD69<sup>+</sup> NK cells in the tumor (A), liver (B), and kidney (C) were measured by flow cytometry after mice being treated with saline, OV-Q1, OV- $\alpha$ mCD47-G2b, and OV- $\alpha$ mCD47-G3.**
