# Supplementary material
Source: PubMed Central journal article supplement (PMC8963132)
Supplement: NIHMS1748878-supplement-13.pdf [file NIHMS1748878-supplement-13.pdf]

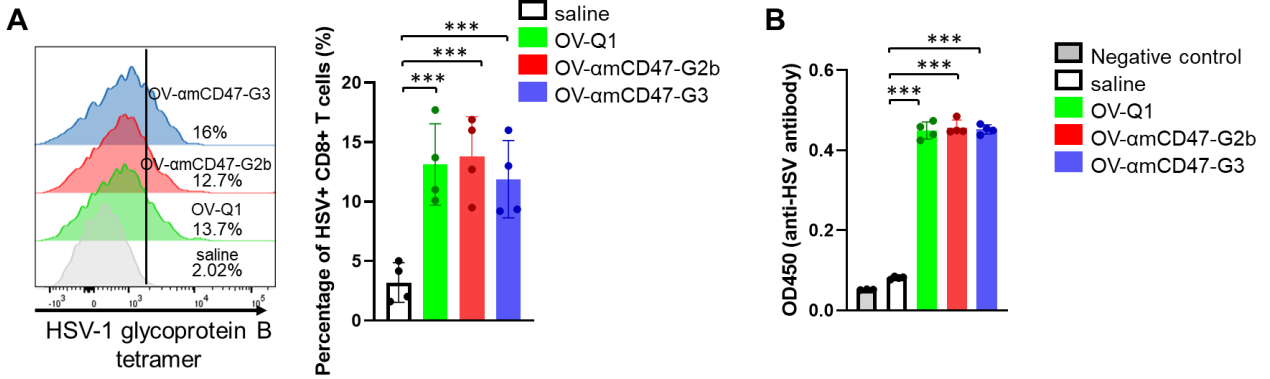

**Supplementary Figure 12. Anti-viral immune responses after OV-amCD47-G2b.** (A) The percentages of anti-HSV-1 CD8<sup>+</sup> T cells were analyzed by flow cytometry. (B) Anti-HSV-1 antibodies were measured by ELISA. Statistical analyses were performed by one-way ANOVA with P values corrected for multiple comparisons by Bonferroni method (n = 3 or 4 mice per group). \*\*\*P ≤ 0.001. Data were presented as mean values +/- SD.
