# Supplementary material
Source: PubMed Central journal article supplement (PMC8963132)
Supplement: NIHMS1748878-supplement-14.pdf [file NIHMS1748878-supplement-14.pdf]

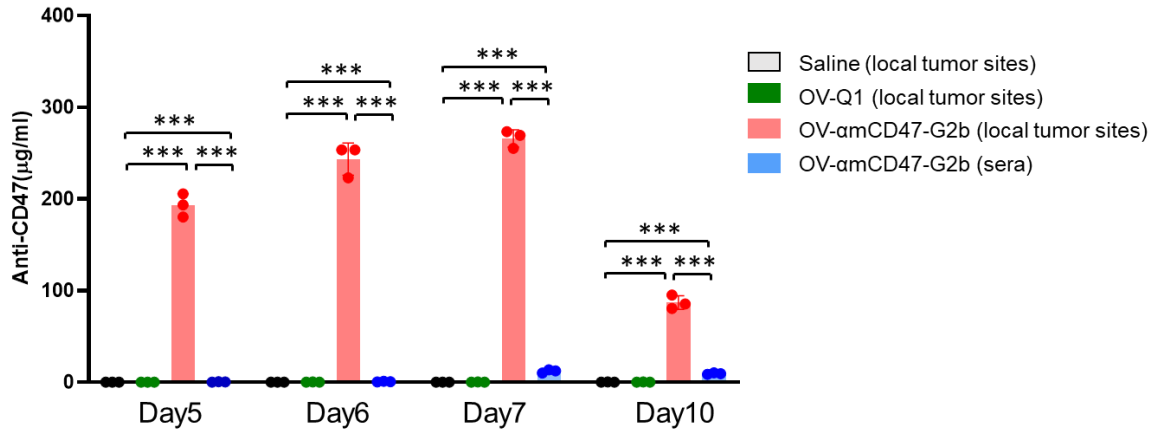

**Supplementary Figure 13. The concentration of αmCD47 antibody in the bloodstream and at the local tumor sites.** Peripheral blood was used to collect sera and tumors in the abdomen were collected and homogenized. The samples were subjected to ELISA to measure the concentration of αmCD47 antibody. Statistical analyses were performed by one-way ANOVA with P values corrected for multiple comparisons by Bonferroni method (n=3 mice per group). \*\*\*P ≤0.001. Data were presented as mean values +/- SD.
