# Supplementary material
Source: PubMed Central journal article supplement (PMC8963132)
Supplement: NIHMS1748878-supplement-15.pdf [file NIHMS1748878-supplement-15.pdf]

## Supplementary table 1

### Primers used in this study

| Name       | Sequence                |
|------------|-------------------------|
| hIL1B F    | TTCGACACATGGGATAACGAGG  |
| hIL1B R    | TTTTTGCTGTGAGTCCCGGAG   |
| hIL6 F     | CCTGAACCTTCCAAAGATGGC   |
| hIL6 R     | TTCACCAGGCAAGTCTCCTCA   |
| hIL10 F    | GACTTTAAGGGTTACCTGGGTTG |
| hIL10 R    | TCACATGCGCCTTGATGTCTG   |
| hIL12A F   | ATGGCCCTGTGCCTTAGTAGT   |
| hIL12A R   | AGCTTTGCATTCATGGTCTTGA  |
| hNOS2 F    | AGGGACAAGCCTACCCCTC     |
| hNOS2 R    | CTCATCTCCCGTCAGTTGGT    |
| hTNF F     | CCTCTCTCTAATCAGCCCTCTG  |
| hTNF R     | GAGGACCTGGGAGTAGATGAG   |
| hCCL2 F    | CAGCCAGATGCAATCAATGCC   |
| hCCL2 R    | TGGAATCCTGAACCCACTTCT   |
| hArg1 F    | GTGGAAACTTGCATGGACAAC   |
| hArg1 R    | AATCCTGGCACATCGGGAATC   |
| hCD206 F   | TCCGGGTGCTGTTCTCCTA     |
| hCD206 R   | CCAGTCTGTTTTTGATGGCACT  |
| 18s rRNA F | GTAACCCGTTGAACCCCAT     |
| 18s rRNA R | CCATCCAATCGGTAGTAGCG    |
