# Supplementary material
Source: PubMed Central journal article supplement (PMC8963132)

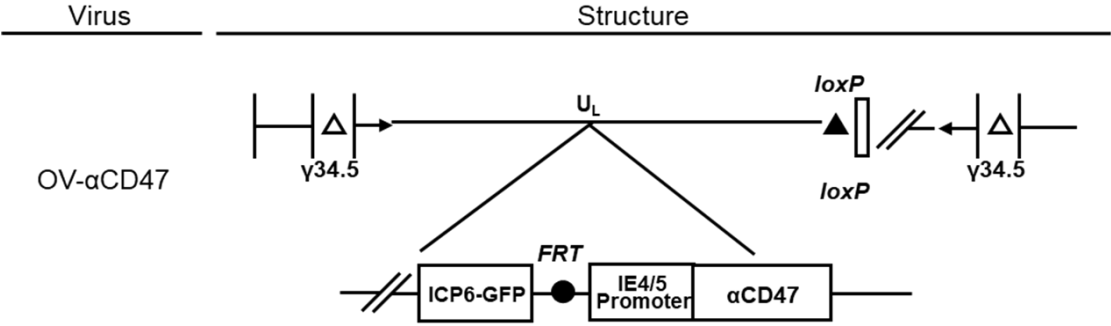

Supplementary Figure 1. Schematic map of OV- $\alpha$ CD47 used in this study.

Supplement: NIHMS1748878-supplement-2.pdf [file NIHMS1748878-supplement-2.pdf]
